# Supplementary material for: Influence of Cysteine and Tryptophan Substitution on DNA-Binding Activity on Maize α-Hairpinin Antimicrobial Peptide
Source: MDPI journal article supplement (doi:10.3390/molecules21081062), 2016-08-13
Supplement: s1 [file s1]

## Supplementary Materials: Influence of Cysteine and Tryptophan Substitution on DNA-Binding Activity on Maize Alpha-Hairpinin Antimicrobial Peptide

Daniel A. Sousa, William F. Porto, Maria Z. Silva, Tatiane R. da Silva and Octávio L. Franco

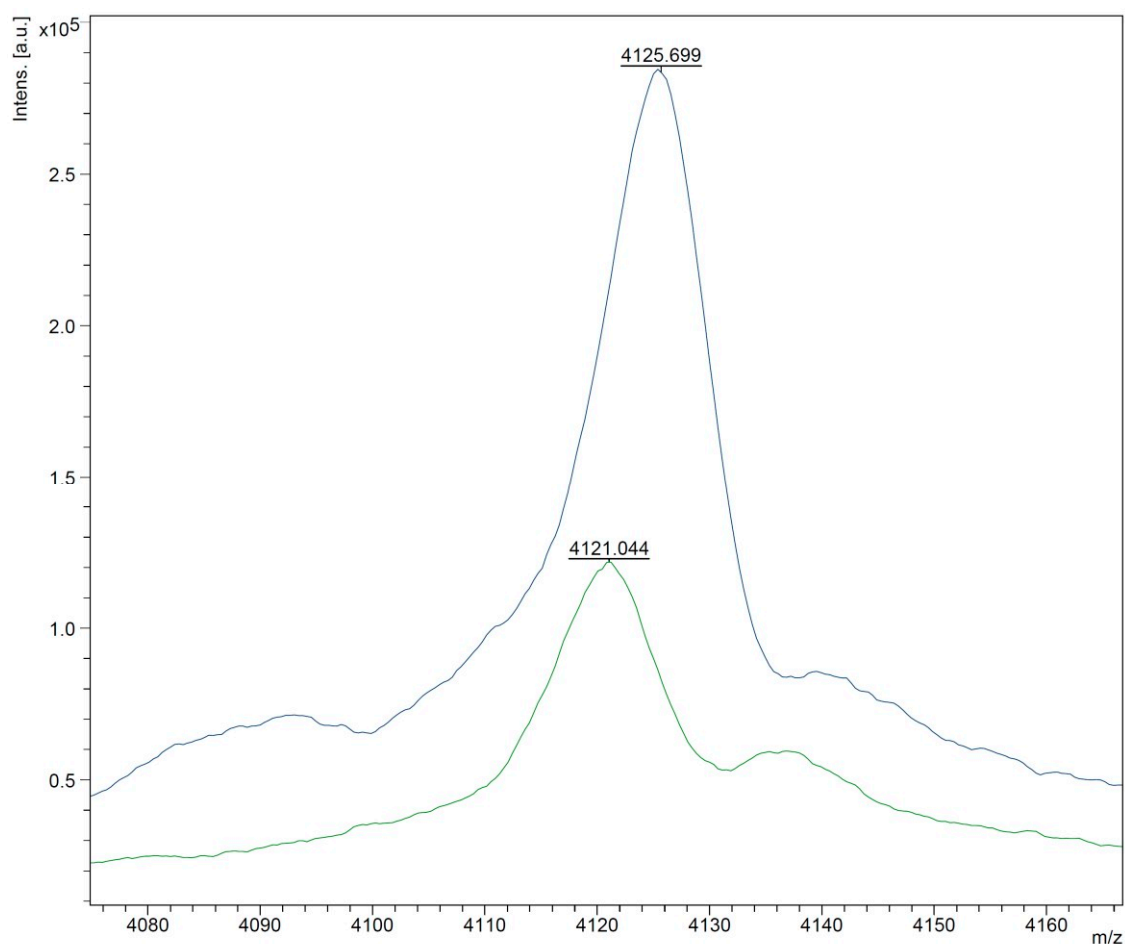

**Figure S1.** MBP-1 mass spectrum before (higher peak—4125.69) and after folding (lower peak—4121.04), showing 4 kDa decrease related to cysteine oxidation.

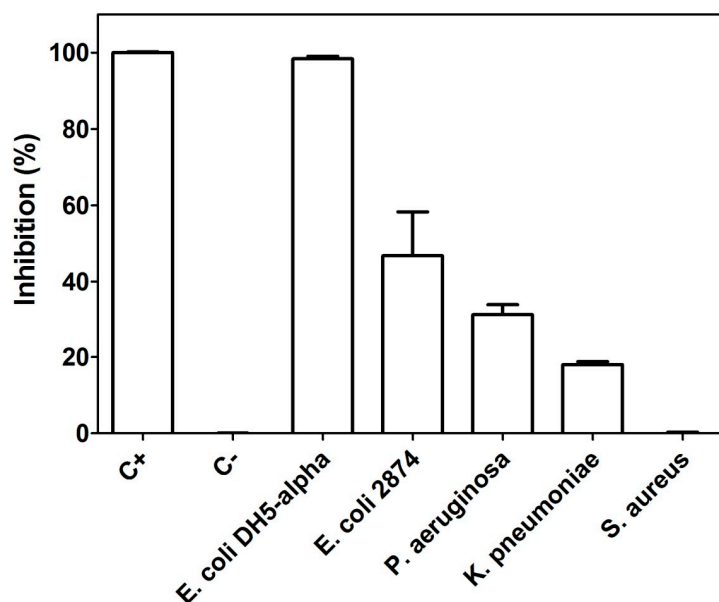

**Figure S2.** Bactericidal assays. Five bacterial lineages were incubated with 50  $\mu$ M of MBP-1. After 2.5 h it was possible to observe the difference in inhibition, which was more pronounced in *E. coli* DH5- $\alpha$ . This strain was chosen for subsequent assays. Chloramphenicol (0.25 mM) was used as positive control, and ultrapure water as negative control.

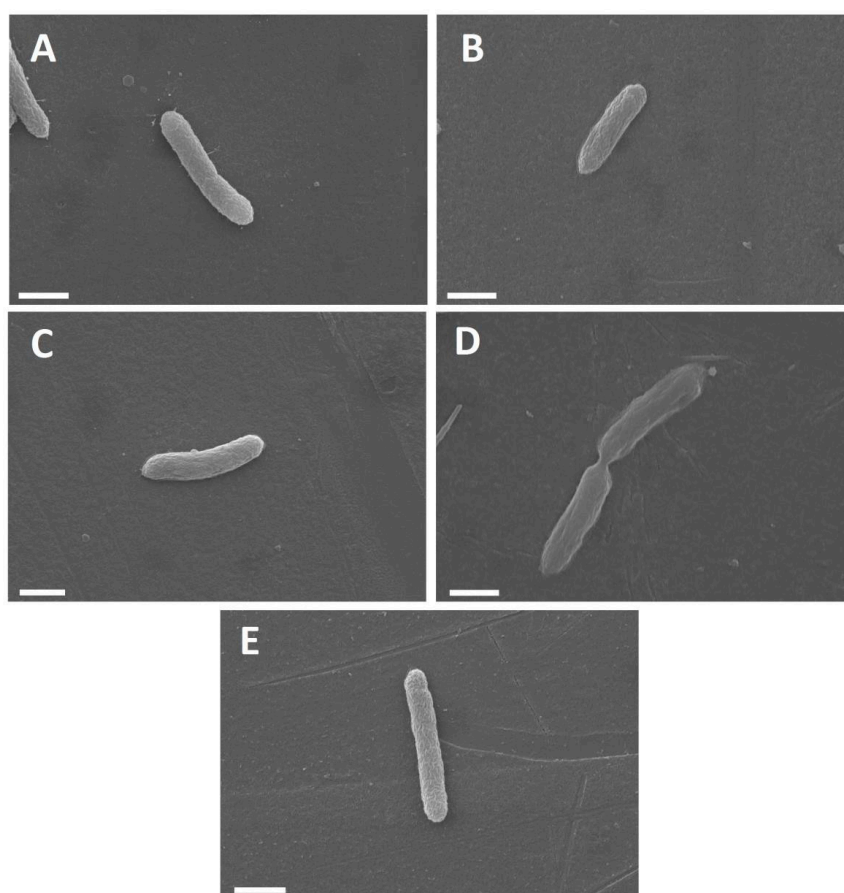

**Figure S3.** Scanning electron microscopy of *E. coli* cells, treated with MBP-1 at 50  $\mu$ M (A); 100  $\mu$ M (B) and Var 1 at 50  $\mu$ M (C); 100  $\mu$ M (D); No peptide as control (E). Scale bar 1  $\mu$ m. Magnification 14,000 $\times$  (A,B,D), 13,000 $\times$  (C) and 15,000 $\times$  (E).
